# 1 EEG-based visual deviance detection in freely behaving mice

2 Renate Kat<sup>a</sup>, Berry van den Berg<sup>b</sup>, Matthijs JL Perenboom<sup>c</sup>, Maarten Schenke<sup>d</sup>, Arn MJM  
3 van den Maagdenberg<sup>c,d</sup>, Hilgo Bruining<sup>e</sup>, Else A Tolner<sup>c,d\*</sup>, Martien JH Kas<sup>a\*</sup>

4 <sup>a</sup>Groningen Institute for Evolutionary Life Sciences (GELIFES), University of Groningen,  
5 Nijenborgh 7, 9747 AG, Groningen, the Netherlands, r.kat@rug.nl, m.j.h.kas@rug.nl

6 <sup>b</sup>Faculty of Behavioural and Social Sciences, Cognitive Neuroscience, Department of  
7 Experimental Psychology, University of Groningen, Grote Kruisstraat 2/1, 9712 TS,  
8 Groningen, the Netherlands, berry.van.den.berg@rug.nl

9 <sup>c</sup>Department of Neurology, Leiden University Medical Center, Albinusdreef 2, 2300 RC,  
10 Leiden, the Netherlands, M.J.L.Perenboom@lumc.nl,  
11 A.M.J.M.van\_den\_Maagdenberg@lumc.nl, E.A.Tolner@lumc.nl

12 <sup>d</sup>Department of Human Genetics, Leiden University Medical Center, Einthovenweg 20,  
13 2300 RC, Leiden, the Netherlands.

14 <sup>e</sup>Department of Child and Adolescent Psychiatry, Amsterdam University Medical Center,  
15 University of Amsterdam, Postbus 7057, 1007 MB, Amsterdam, the Netherlands,  
16 h.bruining@amsterdamumc.nl

17 \*These authors have contributed equally to this work

18

## 19 Corresponding author:

20 Prof. Dr. MJH Kas; Groningen Institute for Evolutionary Life Sciences (GELIFES),  
21 University of Groningen, Nijenborgh 7, 9747 AG Groningen, The Netherlands  
22 m.j.h.kas@rug.nl

**Abbreviations** ERP: event related potential; MMN: mismatch negativity; TFR: time-frequency reponse; V1: primary visual cortex; VEP: visual evoked potential

23 **Abstract**

24 The mouse is widely used as an experimental model to study visual processing. To probe  
25 how the visual system detects changes in the environment, functional paradigms in freely  
26 behaving mice are strongly needed. We developed and validated the first EEG-based  
27 method to investigate visual deviance detection in freely behaving mice. Mice with EEG  
28 implants were exposed to a visual deviant detection paradigm that involved changes in  
29 light intensity as standard and deviant stimuli. By subtracting the standard from the  
30 deviant evoked waveform, deviant detection was evident as bi-phasic negativity (starting  
31 around 70 ms) in the difference waveform. Additionally, deviance-associated evoked  
32 (beta/gamma) and induced (gamma) oscillatory responses were found. We showed that  
33 the results were stimulus independent by applying a “flip-flop” design and the results  
34 showed good repeatability in an independent measurement. Together, we put forward a  
35 validated, easy-to-use paradigm to measure visual deviance processing in freely behaving  
36 mice.

37

38 **Keywords**

39 visual processing, mismatch negativity, sensory processing deficits

## 40 **1. Introduction**

41 The experiments by Hubel and Wiesel on direction selectivity of neurons in the cat visual  
42 cortex (Hubel, 1959; Hubel & Wiesel, 1968) have pioneered a growing scientific field on  
43 the visual system and its processing abilities. Since then, the mouse is a widely used  
44 animal model to investigate visual processing (Baker, 2013). One important reason is that  
45 mice are particularly suitable for genetic modification, such as the use of advanced  
46 genetically encoded tools for neuroimaging and neuromodulation that allow unravelling  
47 of neuronal network dynamics (Warden et al., 2014). Moreover, transgenic mouse  
48 models allow to examine the role of specific cell types or neuronal populations (Sohya et  
49 al., 2007; Hamm and Yuste, 2016), as well as to study altered visual processing in the  
50 context of human psychiatric disorders (Zhang et al., 2017; Hamm et al., 2020;  
51 Perenboom et al., 2020). However, visual processing has hardly been studied in awake,  
52 freely behaving mice, as typically head-fixation is used to ensure that visual stimuli reach  
53 the eye (Montijn et al., 2016; Carrillo-Reid et al., 2019; Fournier et al., 2020). Assessing  
54 measures of visual processing in freely moving mice requires a behavioural setup in  
55 which animals are constantly exposed to visual stimuli in their environment irrespective  
56 of their bodily position.

57 Detecting changes in the environment is an important function of sensory systems.  
58 The brain can shift attention to changes in the environment via either a passive reduction  
59 in the response to redundant stimuli, or an active memory-based increased response to  
60 unexpected, or deviant, stimuli (Garrido et al., 2009). The representation of deviance  
61 detection in the EEG signal has also been called mismatch negativity (MMN; May et al.,  
62 1999). Deficits in deviance detection have been associated with various neuropsychiatric  
63 disorders, mainly schizophrenia (Näätänen et al., 2014; Tada et al., 2019). Visual deviance

64 detection has gained substantially less attention compared to auditory deviance  
65 detection and has only twice been studied in rodents (Hamm and Yuste, 2016; Vinken et  
66 al., 2017). While these studies were able to assess visual deviance detection, the animals  
67 were required to be head-fixated.

68 Here we set out to develop a novel paradigm to measure deviance-induced  
69 differences in visual evoked potentials (VEPs) in freely behaving mice. Based on MMN  
70 oddball concepts used in the context of auditory deviance detection (Harms et al., 2016),  
71 our visual deviant detection paradigm involves changes in light intensity as standard and  
72 deviant stimuli. In order to use the measured EEG waveform difference features for  
73 'deviance detection', the paradigm needs to comply with three principal criteria. First, the  
74 paradigm should be able to elicit a *robust deviance response* as measured through the  
75 difference between the deviant versus standard VEP responses. Second, the deviance  
76 response needs to be *stimulus-independent*, meaning that the same response difference is  
77 found when using either of the two stimuli - in our case increases versus decreases in  
78 light intensity - as deviant. Third, the VEP deviance effect needs to be repeatable in an  
79 independent measurement within the same subject (*repeatability*). After satisfying the  
80 three criteria based on VEP waveforms, characteristics of the frequency responses for the  
81 paradigm were explored to gain insight in visual deviance-induced oscillatory activity. In  
82 addition, the influence of the repeated light stimulation was explored by assessing how  
83 the strength of the observed deviance detection changed with increasing number of  
84 standards preceding a deviant.

85

## 86 **2. Materials and Methods**

### 87 *2.1 Mice*

88 Male C57BL/6J mice (n=13) were used to implement and validate the newly developed  
89 visual deviance detection paradigm. Animals were single-housed in individually  
90 ventilated cages for at least one week prior to surgeries and maintained on a 12:12 light-  
91 dark cycle with *ad libitum* access to food and water. All experiments were approved by  
92 the Animal Experiment Ethics Committee of Leiden University Medical Center and were  
93 carried out in accordance with ARRIVE guidelines and EU Directive 2010/63/EU for  
94 animal experiments. All efforts were made to minimize discomfort of the experimental  
95 animals.

## 96 *2.2 EEG implantation surgery*

97 Stereotactic EEG electrode implantation surgery was performed in mice at the age of 2  
98 months. Under isoflurane anaesthesia (1.5%, in oxygen-enriched air), three silver (Ag)  
99 ball-tip electrodes were implanted epidurally above the right prefrontal cortex (bregma  
100 +2.6 mm anterior, -1.6 mm lateral) and the right and left primary visual cortex (V1;  
101 bregma -3.5 mm posterior, +/- 3.0 mm lateral). The relatively lateral V1 position was  
102 chosen since multiple studies indicate a role for the visual extra-striate areas (which are  
103 located more laterally on the occipital cortex) in the visual deviance detection (reviewed  
104 in: Kimura, 2012; Vinken et al., 2017). Two epidural platinum electrodes were placed  
105 above cerebellum to serve as reference and a ground electrode, respectively.  
106 Electromyogram (EMG) electrodes were placed on top of the neck muscles to record  
107 muscle activity. Light-activated bonding primer and dental cement (Kerr optibond /  
108 premise flowable, DiaDent Europe, Almere, the Netherlands) were used to attach  
109 electrodes to the skull. Post-operative pain relief was achieved by a subcutaneous  
110 injection of Carprofen (5 mg/kg). EEG recordings started after a 14-day recovery period.

## 111 *2.3 EEG and VEP recordings*

112 Tethered EEG recordings were performed in a Faraday cage in which animals were  
113 connected to the recording hardware via a counterbalanced, low-torque custom-build  
114 electrical commutator. Signals were three times pre-amplified, band-pass filtered (0.05  
115 to 500 Hz), then amplified 1200 times and thereafter digitized (Power 1401, Cambridge  
116 Electronic Devices, Cambridge, UK) at a sampling rate of 5000 Hz. For the recording of  
117 VEPs, mice were placed inside a computer-controlled custom-built LED-illuminated  
118 sphere in which tethered mice were able to move freely (Van Diepen et al., 2013). The  
119 sphere (30 cm diameter) was coated with high-reflectance paint that spread light  
120 produced by a ring of white monochromatic LEDs at the top of the sphere around an  
121 opening for the swivel. A baffle prevented the mice from looking directly into the LEDs.  
122 After connecting mice to the setup in the sphere, animals were allowed to habituate for  
123 at least 10 min. Mice were tested once in an input-output paradigm and twice in an  
124 oddball paradigm, all on separate days. The input-output paradigm, in which a train of  
125 light flashes of increasing intensity was presented to the animals, was performed to  
126 determine VEP signal quality. 60 flashes of 1 ms with increasing light intensity between  
127  $\sim 0.4$  to  $1.1 \mu\text{W}/\text{cm}^2/\text{nm}$  were presented at 2 Hz, and 5 flashes of increasing intensity  
128 between  $\sim 1.4$  to  $2.2 \mu\text{W}/\text{cm}^2/\text{nm}$  at 0.5 Hz. The paradigm was repeated 50 times with 20  
129 s rest in-between blocks.

#### 130 *2.4 Visual oddball paradigm*

131 To measure visual deviance detection, a light intensity-based oddball paradigm with  
132 decreases and increases in light intensity was developed (Fig. 1). To ensure stable levels  
133 of light-adaptation before onset of the oddball sequence, the paradigm started with 10  
134 min of constant light of medium intensity ( $0.15 \mu\text{W}/\text{cm}^2/\text{nm}$ ). Subsequently a 7-minute  
135 sequence started in which 300-ms pulses of increased ( $1.7 \mu\text{W}/\text{cm}^2/\text{nm}$ ) or decreased

136 light intensity ( $0.02 \mu\text{W}/\text{cm}^2/\text{nm}$ ) stimuli were interspersed by a 500-ms inter-stimulus  
137 interval of the  $0.15 \mu\text{W}/\text{cm}^2/\text{nm}$  constant light intensity (Fig. 1). The constant level of  
138 light in between the sequence of standard and deviant stimuli was used to prevent  
139 occurrence of dark adaptation between stimuli. The intensities of increases ( $1.7$   
140  $\mu\text{W}/\text{cm}^2/\text{nm}$ ) and decreases ( $0.02 \mu\text{W}/\text{cm}^2/\text{nm}$ ) were chosen based on VEP amplitudes  
141 in the grand average input-output curve in such a way that the amplitude change from  
142 decrease to ISI level was the same as the amplitude change from ISI to increase level. The  
143 stimulus duration of 300 ms was based on earlier visual MMN studies that used stimulus  
144 durations between 80 and 500 ms, in humans (Stagg et al., 2004; Kimura et al., 2010;  
145 Sulykos and Czigler, 2014) and rodents (Hamm and Yuste, 2016; Vinken et al., 2017).  
146 Deviant stimuli were semi-randomly spread through the sequence, with the constraint of  
147 a minimum of two standard presentations before the next deviant. The first stimulation  
148 block in the paradigm contained 500 stimuli, 473 (87.4%, the standard) of which were  
149 intensity increases and 63 (12.6%, the deviant) of which were light intensity decreases.  
150 After this block, the paradigm (including the 10 minutes constant light at the start) was  
151 repeated with a swap of standard and deviant stimulus type. This so called ‘flip-flop’  
152 paradigm allowed for assessment of differences between standard and deviant stimuli  
153 irrespective of stimulus type (Harms et al., 2016), in our case increased vs decreased light  
154 intensity. The visual oddball paradigm was performed twice for every animal on separate  
155 days. The order of the first and second recording was counterbalanced over the morning  
156 (1<sup>st</sup> half of the light phase) and the afternoon (2<sup>nd</sup> half of the light phase).

## 157 *2.5 Analysis*

158 No animals had to be excluded on the basis of low signal quality found in the input-output  
159 paradigm. For two animals, positive-negative inverted signals were evident on one of the

160 visual cortex electrodes (once right V1 and once left V1); these electrodes were excluded  
161 from analysis. Next, recordings were manually checked to exclude recording periods with  
162 artefacts, as well as periods of sleep, as deviance detection is known to be attenuated or  
163 even absent in non-REM sleep (Sculthorpe et al., 2009). For sleep detection, recordings  
164 were first screened for the presence of periods where an infrared motion detector did not  
165 pick up non-specific locomotor activity. If periods without locomotor activity were  
166 present during stimulus presentation, they were checked for the presence of non-REM  
167 sleep, as defined by high amplitude delta (<4 Hz) waves, so called slow waves, in the  
168 frontal EEG signal in combination with an absence of activity in the EMG signal. Two  
169 recordings which contained periods of sleep were excluded from analysis (both being the  
170 first recording of the animal).

171 Data pre-processing was performed in Matlab (Versions 2018a & 2018b,  
172 MathWorks, Natick, MA, USA). EEG data were low-pass filtered at 70 Hz with a fourth  
173 order Butterworth filter. For evoked potential waveform analysis, VEPs were extracted  
174 from the data of each recording electrode from 50 ms before until 300 ms after stimulus  
175 onset. Subsequently, VEPs were grouped into deviant and standard stimuli, irrespective  
176 of being a light intensity increase or a light intensity decrease. Within those two  
177 categories, all VEPs were averaged, and baseline corrected, using a latency window that  
178 ranged from -50 to 0 to ms prior to the change in light intensity. Difference waves were  
179 calculated by subtracting the standard from the deviant VEP. A comparison between the  
180 difference waves of the right and left V1 electrode (using cluster-based permutation  
181 analysis) did not reveal any time windows of significant differences (data not shown). In  
182 subsequent analyses VEPs from the right and left electrode were averaged.

183 For analysis of time-frequency responses (TFRs), single trial data (i.e. from a single  
184 stimulation; either a standard or deviant) were extracted from the EEG signal from 1 s



185 before to 1.5 s after stimulus onset. For time-frequency analysis, the data was low-pass  
186 filtered at 150 Hz. Like with the VEP analysis, trials were grouped into standards and  
187 deviants irrespective of the stimulus being a light increase or decrease. Using the  
188 FieldTrip toolbox for EEG/MEG-analysis (Oostenveld et al., 2011; Donders Institute for  
189 Brain, Cognition and Behaviour, Radboud University, the Netherlands), Hanning window  
190 convolution was performed with 5ms time windows. Frequencies were extracted from 4  
191 - 150 Hz with 1-Hz linear steps. The number of cycles increased from 2 to 10 with  
192 increasing frequency. Next, power was converted to a log<sub>10</sub> scale and an absolute  
193 baseline correction was performed using a window from 200 until 100 ms before  
194 stimulus onset as the baseline. This window was chosen to avoid including stimulus  
195 related activity that would be smeared (in time) due the width of the Hanning window.  
196 The average time-frequency map of standard trials was subtracted from the average  
197 time-frequency map of deviant trials. Additionally, to assess non-phase-locked TFRs, per  
198 condition the *average* VEP response was subtracted from individual trials in the time  
199 domain before performing the same time-frequency analysis as described above  
200 (Stoohart and Kazanina, 2013).

## 201 *2.6 Statistics*

202 To test whether deviance detection was significantly different from zero for both the  
203 VEPs and TFRs, cluster-based permutation analysis was used as previously described  
204 (Maris and Oostenveld, 2007). In short, dependent *t*-test statistics were obtained for every  
205 time- (0.2-ms steps) or time-frequency point (5-ms to 1-Hz steps) and were clustered  
206 over time (and frequency) along adjacent points that reached above the *t*-value threshold  
207 corresponding to an alpha-level of 0.05. The sum of all *t*-values in a cluster was used as  
208 the cluster statistic. To assess significance of these clusters, a ‘null’ distribution was

209 created by performing 1000 random permutations with the individual animal difference  
210 waves/maps and zero. Cluster statistics were extracted for every permutation in the  
211 same manner as described above. Both the largest positive and the largest negative  
212 cluster from each permutation were used to create two distributions. Clusters in the  
213 actual data were considered significant when exceeding the 97.5-percentile threshold  
214 for cluster size in either the positive or negative distribution.

215         Comparable procedures were used to compare VEP features between right and  
216 left electrodes, light intensity increases and decreases, and first and second recordings.  
217 However, in these cases permutations were performed by randomly exchanging the data  
218 between the two conditions in the comparison. Clusters were reported when  $p < 0.2$ , were  
219  $p < 0.05$  was considered significant. Cluster-based permutation analysis does not have a  
220 good level of precision for finding exact on- and off-sets, therefore borders of the time,  
221 as well as time-frequency, windows of reported clusters should be interpreted carefully  
222 (Sassenhagen and Draschkow, 2019). To explore the effects of the number of standards  
223 since the last deviant, in other words the number of preceding standards, on neural  
224 responses (both VEPs and TFRs) and deviance detection amplitude, linear mixed  
225 modelling was performed (Bates et al., 2015; Kuznetsova et al., 2017). Models were  
226 estimated and analysed using package lme4 (RStudio, version 1.2.5042 (R-version 4.0),  
227 Boston, MA, USA; lme4 package version 1.1-23) and lmerTest. Using mixed models  
228 allowed taking into account the number of individual trials that contribute to a condition  
229 (as opposed to calculating the unpoled means per subject, per condition, losing this type  
230 of information). The VEP waveform mean amplitudes were extracted from each  
231 individual trial in the latency windows that were found to be significant clusters in the  
232 evoked potential analysis, resulting in two separate models for an early (40 to 60 ms)  
233 and a late (70 to 150 ms) latency window. Similarly, the mean frequency power from

234 each of the TFR clusters (across frequencies and time) that were found to be significant  
235 was also extracted. These mixed modelling analyses should be viewed as exploratory  
236 only; by using a time and frequency window defined by an earlier statistical analysis, we  
237 are increasing type I error-rate by an unknown amount (Kriegeskorte et al., 2009).

238 The amplitude of the VEP waveforms and power of the TFRs were inspected as a  
239 function of the number of trials since the last deviant, for both standards and deviants,  
240 and light increases and decreases. Fewer observations were available for increasing  
241 number of trials since the last deviant. A model was constructed with model selection  
242 based on Akaike Information Criterion (AIC) to control for type I error rate, with  
243 statistical significance assessed using Satterthwaite estimation of effective degrees of  
244 freedom (pooled degrees of freedom) (Matuschek et al., 2017).

$$\begin{aligned} 245 \quad mV_n | \text{cluster power}_n \\ 246 \quad &= \beta_{0j} + \beta_1 \# \text{trials}_{j[n]} + \beta_2 \text{stimulus}_{j[n]} + \beta_3 \text{light}_n + \beta_4 \# \text{trials}_n \cdot \text{stimulus}_n \\ 247 \quad &+ \beta_5 \# \text{trials}_n \cdot \text{light}_n + \beta_6 \text{stimulus}_n \cdot \text{light}_n + \beta_7 \# \text{trials}_n \cdot \text{stimulus}_n \cdot \text{light}_n + \epsilon_n \end{aligned}$$

248 In this formula, for each trial  $n$ , the VEP and TFR amplitudes were described by an  
249 intercept  $\beta_0$  which indicates a random intercept per animal,  $\beta_1$  which indicates the  
250 number of trials since last deviant (1-30),  $\beta_2$  which relates to whether the trial was a  
251 deviant or a standard and  $\beta_3$  which indicates whether the trial was a light increase or  
252 decrease. Finally,  $\beta_{4-7}$  are the interactions between those terms and  $\epsilon_n$  is the residual  
253 error term.

254 VEP figures were constructed in GraphPad Prism (Version 8, GraphPad Software,  
255 San Diego, CA, USA). Figures of the TFR were constructed in Matlab. Figures of the mixed  
256 linear modelling data were constructed in RStudio. All data and analysis code (R and  
257 Matlab) is available on the OSF data repository ([www.osf.io/6bhwf/](http://www.osf.io/6bhwf/)).

258

## 259 **3. Results**

### 260 *3.1 Visual deviance detection can be assessed in freely behaving mice*

261 For the development of the visual deviance detection paradigm for freely behaving mice,  
262 we designed an oddball paradigm with sequences of 300-ms white light pulses of  
263 increased ( $1.7 \mu\text{W}/\text{cm}^2/\text{nm}$ ) or decreased ( $0.2 \mu\text{W}/\text{cm}^2/\text{nm}$ ) light intensity, interspersed  
264 by a 500-ms interstimulus interval at constant light of intermediate intensity ( $0.15$   
265  $\mu\text{W}/\text{cm}^2/\text{nm}$ , Fig. 1). Deviant stimuli (63 of 500 stimuli, 12.6%) were semi-randomly  
266 spread throughout the sequence with the constraint of a minimum of two standard  
267 presentations before the next deviant. In the paradigm both increases and decreases in  
268 light intensity were presented once as standard and once as deviant ('flip-flop' paradigm;  
269 Harms et al., 2016, Fig. 1). The paradigm was presented twice, on separate days. For the  
270 first analysis, VEP responses were averaged for, respectively, all standard and deviant  
271 stimuli, regardless of being a response to a light increase or light decrease. VEPs recorded  
272 from the right and left primary visual cortex (V1), and the first and the second  
273 measurement were combined.

274 Visual inspection of the averaged VEPs revealed a clear distinction between  
275 standard and deviant waveforms (Fig. 2A). Both for deviant and standard stimuli, VEPs  
276 showed an initial N1 negativity around 30 ms after stimulus onset, followed by a broad  
277 positivity between  $\sim 50$  and  $\sim 150$  ms. Compared to the response to standard stimuli, the  
278 deviant N1 deflection was slightly broadened, while the later broad positivity was of  
279 lower amplitude than observed for the standard response. Consequently, the difference  
280 wave, computed by subtracting the standard from the deviant response, consisted of a bi-  
281 phasic negative component, between  $\sim 35$  and  $\sim 150$  ms, with a maximum peak amplitude  
282 of  $-0.048 \pm 0.027$  mV (Fig. 2B). Cluster-based permutation analysis revealed two

283

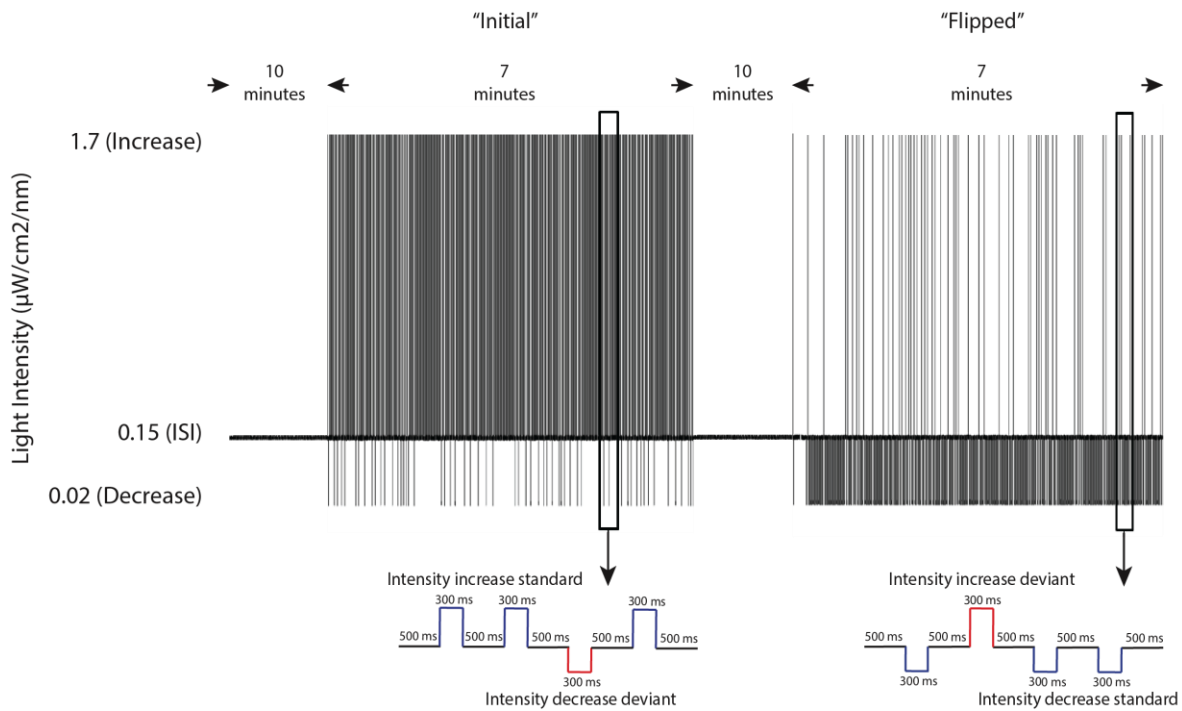

284

285 **Figure 1 Graphical representation of the light-intensity oddball paradigm used for visual deviance**

286 **detection in freely behaving mice.** Mice were presented with an oddball paradigm with increases (1.7

287 µW/cm²/mm) and decreases (0.02 µW/cm²/mm) in light intensity as stimuli, with intermittent

288 intermediate intensity levels (0.15 µW/cm²/mm). The paradigm was presented as a 'flip-flop' in which the

289 "initial" presentation with intensity increase standards and intensity decrease deviants (left), was followed

290 by a "flipped" presentation with intensity decrease standards and intensity increase deviants (right). Initial

291 and flipped stimulation blocks lasted ~ 7 min each. Before the initial stimulation block and in between the

292 initial and flipped stimulation blocks, 10 min of constant intermediate light (0.15 µW/cm²/nm) was

293 presented. For the analysis, standards of increased intensity were compared to deviants of increased

294 intensity, and standards of decreased intensity are compared to deviants of decreased intensity.

295 deviance-associated components. The early negative component in the difference wave,

296 ~35-60 ms after stimulus onset, showed a trend towards significance (p=0.072), whereas

297 the late negative component, ~70-150 ms after stimulus onset, was significantly different

298 from zero (p=0.004). Our visual oddball paradigm thus meets the first criterion of *yielding*

299 *a robust deviance response*, as a significant difference in the response to deviant compared

300 to standard light stimuli could be assessed from VEPs recorded from V1 in freely

301 behaving mice. Compared to the V1 EEG recordings, the oddball paradigm elicited no  
302 apparent VEP responses at the prefrontal electrode, nor a distinguishable difference  
303 wave (data not shown), indicating specificity of the test paradigm to the visual system.

304 **Figure 2 Visual deviance detection in the visual**  
305 **evoked potential responses to an intensity**  
306 **oddball paradigm in freely behaving mice. (A)**

307 Grand average VEP waveforms in response to  
308 standard and deviant stimuli. Responses were  
309 averaged for, respectively, all standard or all  
310 deviant stimuli, independent of the standard or  
311 deviant representing a stimulus of increased or  
312 decreased light intensity. Responses of the right  
313 and left V1, as well as the first and second  
314 recording were combined. Data are presented as  
315 mean  $\pm$  standard error of the mean (SEM). **(B)**  
316 Deviant minus standard difference wave for the  
317 combined 'intensity increase' and 'intensity

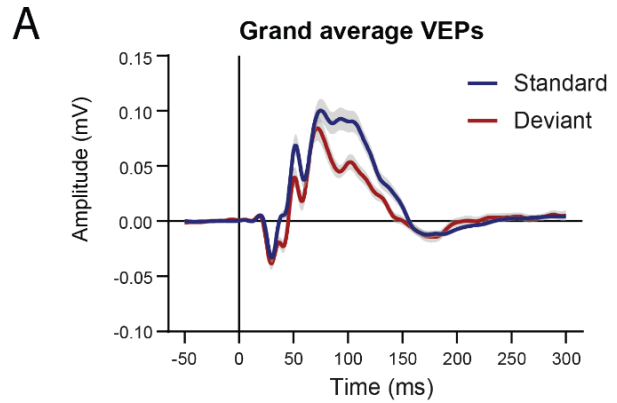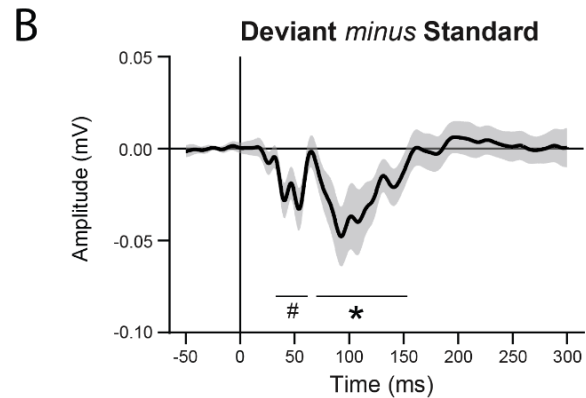

318 decrease' deviants and standards. Data are presented as mean  $\pm$  95% confidence interval.  $n = 13$ ,  $*p < 0.01$ ,  
319  $\#p < 0.1$ .

320

### 321 *3.2 Visual deviance detection in the late VEP component is stimulus-independent*

322 To meet the deviance detection criterion of stimulus independency, the difference  
323 between VEP responses to standard and deviant stimuli of intensity increases and  
324 intensity decreases should contain similar components. Visual inspection of the standard  
325 and deviant VEP waveforms (averaged over the responses from V1 left and right, and the  
326 two different recording days) revealed different features in the context of intensity

327 increase or decrease stimuli, in particular with respect to the early latencies. Specifically,  
328 the VEP in response to an intensity increase, for both standard and deviant stimuli,  
329 contained additional early latency components between 20 and 60 ms that were not  
330 evident in the VEP in response to an intensity decrease (Fig. 3A).

331 While the early components of standard and deviant VEP waveforms for light  
332 increases and decreases differed, when subtracting the standard from the deviant  
333 response for stimuli of the same light change (i.e. increase or decrease), the deviant-  
334 minus-standard difference waves were remarkably similar for both light intensity  
335 changes with respect to the late component around 100 ms (Fig. 3B). The late component  
336 of the difference wave, at a latency range of ~70-150 ms, was significantly different from  
337 zero for both the intensity increase ( $p=0.04$ ) as well as the intensity decrease responses  
338 ( $p=0.032$ ). On the other hand, the early component of the difference wave was only  
339 evident in the difference wave of an intensity increase ( $p=0.024$ ). For the difference wave  
340 of the intensity decrease responses, the shape of the early component was visible but did  
341 not differ in amplitude from zero (cluster-based permutation analysis found two clusters  
342 due to the return to baseline:  $p=0.528$  and  $p=0.602$ , a one-sample *t*-test on the mean  
343 amplitude of the whole latency window 43-62 ms:  $p=0.071$ ). After 150 ms, the difference  
344 waves from the intensity increase and decrease responses showed slow shifts in opposite  
345 direction which was most evident beyond the ~200 ms latency range of the original VEPs  
346 (intensity increase:  $p=0.034$ ; intensity decrease:  $p=0.002$ ). When comparing the features  
347 of the light increase and the light decrease difference waves directly, a trend-significant  
348 difference was found for the early component (~20-60 ms,  $p=0.054$ ), but no differences  
349 were found for the late component ( $p=0.72$ ). In addition, outside the identified window  
350 of deviance detection (~30-150 ms), a significant difference between the intensity  
351 increase and decrease difference waves was found for

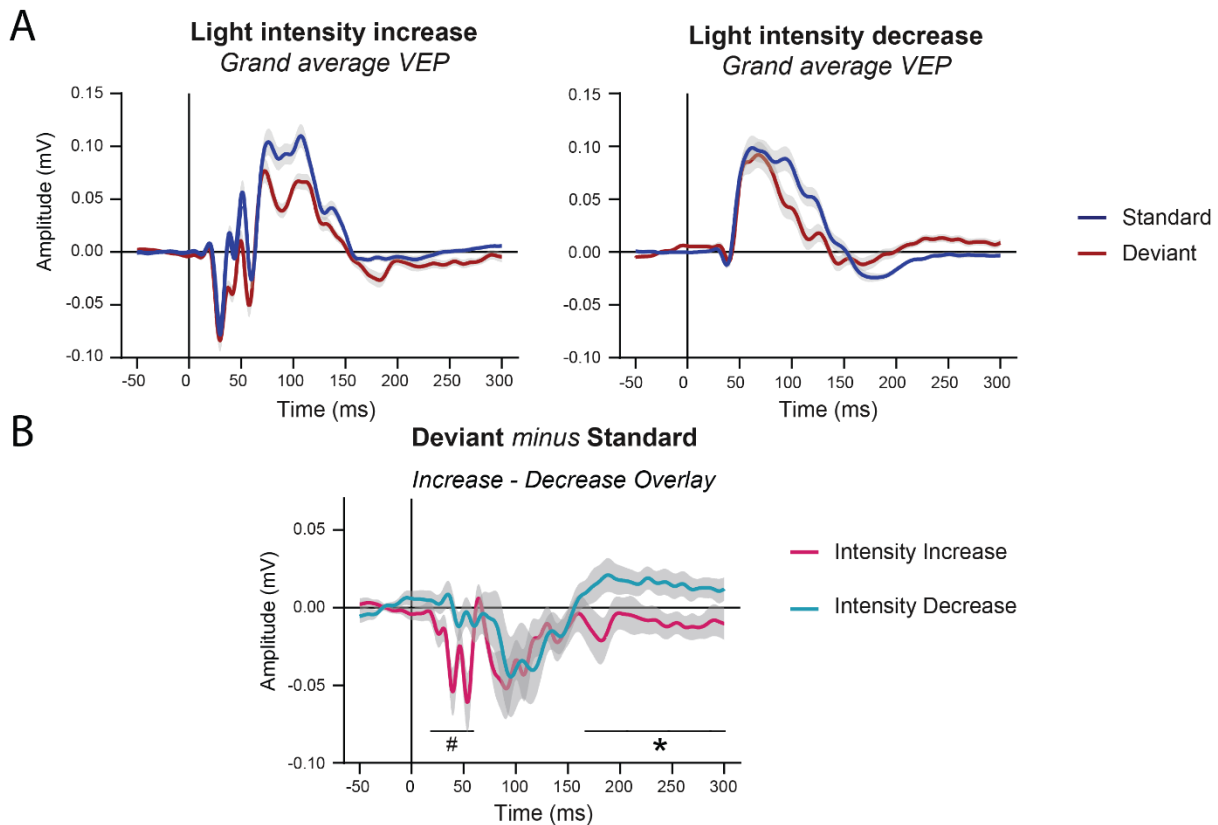

352

353 **Figure 3 Visual deviance detection in the visual evoked potential responses to light pulses of**

354 **increased or decreased intensity. (A)** The VEP waveforms for, respectively, 'intensity increase' (left) and

355 'intensity decrease' (right) deviants and standards. Data are presented as mean  $\pm$  standard error of the

356 mean (SEM). **(B)** Overlay of the intensity increase and intensity decrease difference waves. The early

357 negative wave component between 20-60 ms is present only in the difference wave for intensity increase

358 deviants and standards, the late negative wave component around 100 ms is present in both difference

359 waves. A trend level difference between the two difference waves is observed for the early latencies

360 between 20-60 ms. For latencies between 170-300 ms, the waveforms of the intensity increase and

361 decrease difference waves are significantly different. Data are presented as mean  $\pm$  95% confidence

362 intervals. Responses were averaged for right and left V1, as well as the first and second recording.  $n = 13$ ,

363 \* $p < 0.01$ , # $p < 0.1$ .

364 the additional late component between  $\sim 170$ -300 ms ( $p = 0.004$ ). In conclusion, although

365 the early latency component was more pronounced in light intensity increase difference

366 waves, the late negative component at  $\sim 100$  ms was highly similar for the responses to

367 light intensity increases and decreases. With the use of this component of the deviant-



368 minus-standard difference waves, our visual deviance detection paradigm thus satisfies  
369 our second criterion of *stimulus independency*.

370         The comparison of the intensity increase and decrease responses also revealed,  
371 perhaps not surprisingly, that the ‘off-response’ to an intensity increase – in essence  
372 being an intensity decrease – showed a VEP similarly shaped as the ‘on-response’ of the  
373 intensity decrease and vice versa (Supplementary Fig. 1). Increases and decreases in light  
374 intensity thus seemed to be processed as *shifts* in light intensity rather than as flashes of  
375 *different* intensities. The on- and off-responses to a light increase showed slightly higher  
376 amplitudes compared to the on- and off-responses to a light decrease. The chosen  
377 magnitude of the intensity shifts, which was larger for increases than decreases (i.e. a  
378 shift from 0.15 to 1.7 compared to 0.15 to 0.02  $\mu\text{W}/\text{cm}^2/\text{mm}$ ), was selected based on tests  
379 with a 1-ms flash VEP paradigm that showed an equal amplitude difference for both  
380 increase and decrease intensities compared to the VEP amplitude response to the ISI  
381 intensity. However, in the deviant paradigm the larger intensity shifts still evoked a  
382 slightly higher amplitude response. As the latencies of all identified deviance detection  
383 components fall within the 300-ms duration of the light stimuli, these off-responses do  
384 not affect our deviance detection.

### 385 *3.3 Visual deviance detection shows repeatability in an independent measurement*

386 Our third criterion for a deviance detection paradigm concerns repeatability of the  
387 outcome in independent measurements. To assess this, each animal was subjected to the  
388 visual oddball paradigm twice on two separate days. Using cluster-based permutation  
389 analysis, no differences between the first and second recording were observed for either  
390 the standard VEPs, deviant VEPs or difference waves for the combined responses to  
391 intensity increases and decreases (Fig. 4). Only one small cluster with a trend towards

392 significance was found for the standard VEP (~100-110 ms,  $p=0.066$ ). These outcomes  
393 indicate that our visual oddball paradigm has a good *test-retest reliability* and therefore  
394 also meets the third criterion.

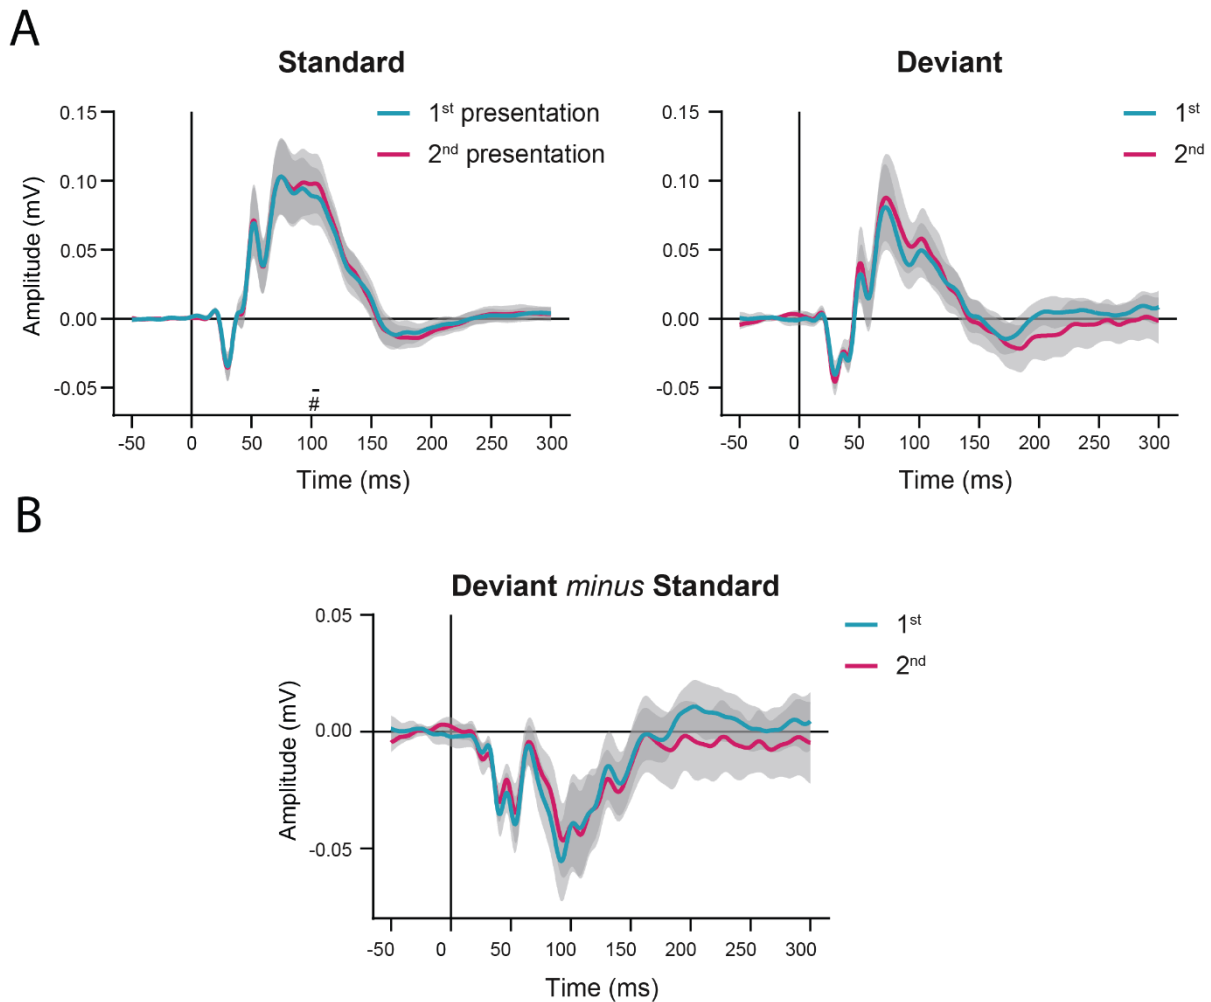

395  
396 **Figure 4. Comparison of the visual evoked potential responses from the 2 independent**  
397 **measurements.** The same light intensity oddball paradigm was presented to all mice twice, on separate  
398 days (i.e. 1<sup>st</sup> and 2<sup>nd</sup> presentation). **(A)** VEPs in response to standard and deviant stimuli, averaged for,  
399 respectively, the 1<sup>st</sup> and the 2<sup>nd</sup> presentation. **(B)** Overlay of the deviant minus standard difference waves.  
400  $n = 11$ , data are presented as mean  $\pm$  95% confidence interval. Cluster-based permutation analysis did not  
401 reveal any significant differences between the 1<sup>st</sup> and the 2<sup>nd</sup> presentation.

402 *3.4 Visual deviance detection is also evident from the light-triggered time-frequency*  
403 *response*

404 In addition to examining VEP waveform features from the deviant-standard difference  
405 waves, we analysed the EEG TFR. Human studies showed that visual deviance detection  
406 has oscillatory components that are not phase-locked to the stimulus and would  
407 therefore cancel out when averaging over trials that is part of classical event-related  
408 potential (ERP) analysis (Stothart and Kazanina, 2013). TFRs are time-locked, but in  
409 contrast to ERP waveforms, not necessarily phase-locked to the stimulus and can  
410 therefore give a more complete picture of stimulus-associated activity. Visual inspection  
411 of the frequency spectra in response to standards and deviants revealed activity in  
412 several frequency ranges. The EEG response to standard stimuli – combined for intensity  
413 increases and decreases – showed an apparent increased power for the beta-lower  
414 gamma (~20-40 Hz, labelled with ‘1’ in Fig. 5A) and the gamma range (~50-100 Hz,  
415 labelled with ‘2’ in Fig. 5A) at a latency between ~20 and ~70 ms after stimulus onset. In  
416 addition, a broad increase in power was seen for the theta range (~4-9 Hz, labelled with  
417 ‘3’ in Fig. 5A), evident from stimulus onset to a latency of ~200 ms. While the TFR to  
418 deviant stimuli showed an overall comparable pattern (Fig. 5A), comparison between  
419 deviant and standard TRFs in a deviant minus standard heatmap revealed multiple  
420 clusters with significantly different frequency components (Fig. 5A). Most evident was a  
421 cluster between ~20-120 ms, indicating increased EEG power in the range from ~10-70  
422 Hz in response to deviants ( $p=0.022$ , labelled with ‘A’ in Fig. 5A). This cluster seemed to  
423 be the result of a combination of an altered shape of the beta/gamma response (labelled  
424 with ‘1’) to the deviant compared to the standard stimuli, as well as an additional deviant  
425 response in the alpha/beta band (~10-20 Hz, labelled with ‘4’ in Fig. 5A) which was not  
426 evident in the response to the standard. The gamma response (~50-100 Hz) contained  
427 less power in response to deviant compared to standard stimuli ( $p=0.048$ , labelled with  
428 ‘B’ in Fig. 5A). Lastly, increased EEG power in

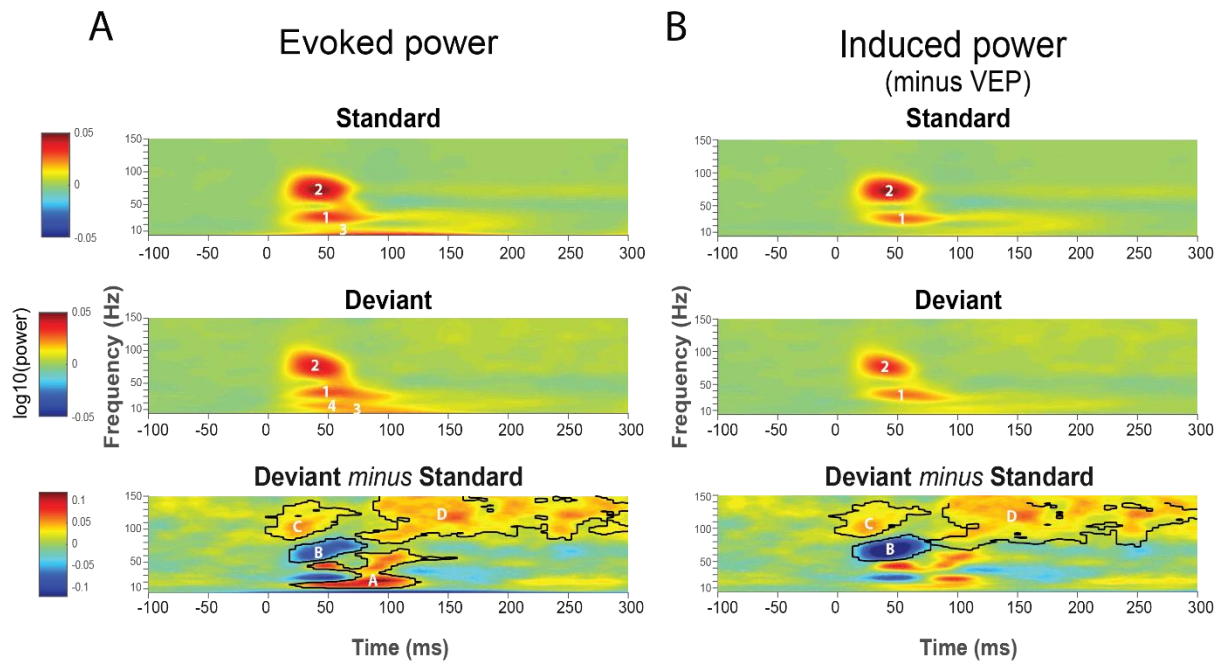

429

430 **Figure 5. Visual deviance detection in the time-frequency response.** Panels show clusters of the power  
431 of both overall evoked oscillatory activity **(A)**, as well as induced oscillatory activity **(B)** in the visual  
432 deviance detection paradigm. To isolate induced oscillatory activity, the averaged waveform was  
433 subtracted from each individual trial before running a time-frequency analysis. From top to bottom panel  
434 time-frequency responses to standard stimuli, deviant stimuli, and a deviant minus standard difference  
435 plot are shown. TFRs were obtained by performing Hanning-window convolution 4-150 Hz with 5 ms time  
436 steps. Absolute baseline-correction was performed using -0.2 - -0.1 ms as the baseline. TFRs to light  
437 increases and decreases, the right and left V1 as well as and second recording were averaged. Y-axis lower  
438 cut-off is 4 Hz. In the difference plot, significant ( $p < 0.05$ ) time-frequency clusters are outlined.  $n = 13$ .

439 the high gamma range ( $\sim 80$ -150 Hz) was seen in response to the deviant compared to  
440 the standard, both shortly following stimulus onset between  $\sim 0$ -60 ms ( $p = 0.036$ , labelled  
441 with 'C' in Fig. 5A) and in a later window between  $\sim 90$  and  $\sim 300$  ms ( $p = 0.002$ , labelled  
442 with 'D' in Fig. 5A).

443 Oscillatory activity can be divided into evoked power, which is the direct  
444 frequency representation of the VEP waveform response, and induced power, which is  
445 the oscillatory activity that is non-phase-locked to the stimulus and thus not found in the  
446 VEP waveforms (Jones, 2016). To assess which oscillatory clusters in our analysis

447 represented evoked power and which clusters represented induced power, the time-  
448 frequency analysis was also ran after subtracting the average VEP waveform from every  
449 single trial per condition (Park et al., 2018). Clusters 3 and 4 in the TFR and cluster A in  
450 the difference plot were no longer present after this analysis (Fig. 5B) and thus represent  
451 evoked power. On the other hand, clusters 1 and 2 in the TFR and clusters B, C and D in  
452 the difference plot were still present after running time-frequency analysis on mean-  
453 subtracted data and represent the power of induced oscillatory activity. With our visual  
454 oddball paradigm in freely behaving mice, deviance detection was thus not only reflected  
455 in the VEP waveforms, but also in evoked as well as induced power in the EEG time-  
456 frequency responses.

### 457 *3.5 Higher numbers of standards preceding a deviant strengthen visual deviance detection*

458 In light of the ongoing debate about the role of adaptation to the repeatedly presented  
459 standards in deviance detection paradigms (Garrido et al., 2009; Grimm et al., 2016), we  
460 assessed whether stimulus history influenced our VEP-based visual deviance detection.  
461 We explored whether the deviance detection amplitude (VEP- and TRF-based) changed  
462 with varying numbers of standards preceding the deviant. In addition, we assessed  
463 whether this was potentially also affected by the stimulus types, i.e., an intensity increase  
464 or decrease. The mean amplitude and oscillatory power of standard and deviant VEPs  
465 and TFRs were extracted from each trial, for both the cluster-based defined early (40-60  
466 ms) and late (70-150 ms) latency windows rounded to the nearest ten, and the identified  
467 gamma (B, ~50-100 Hz) and high gamma (C and D, ~80-150 Hz) induced frequency  
468 clusters.

A

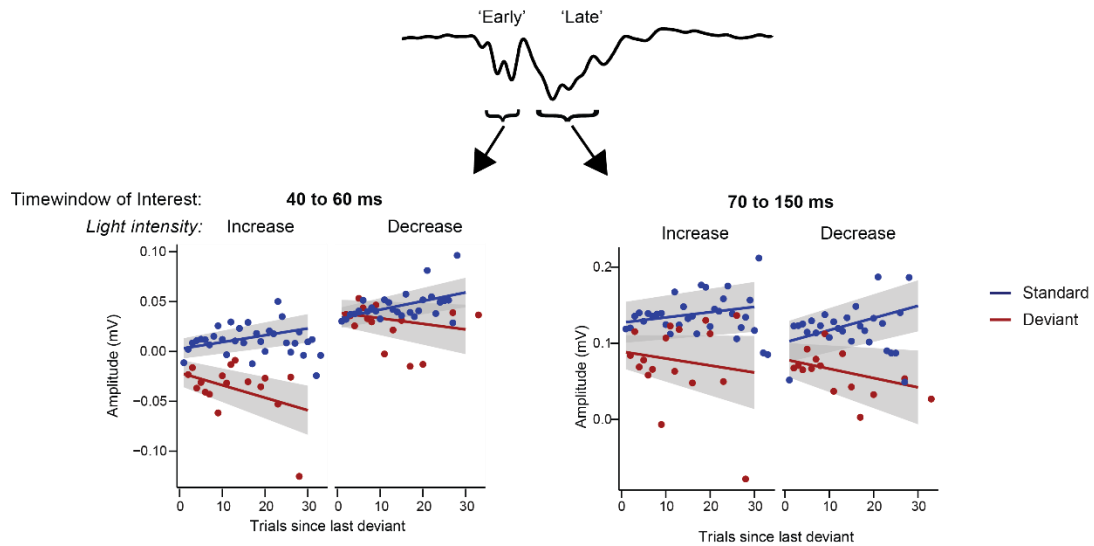

B

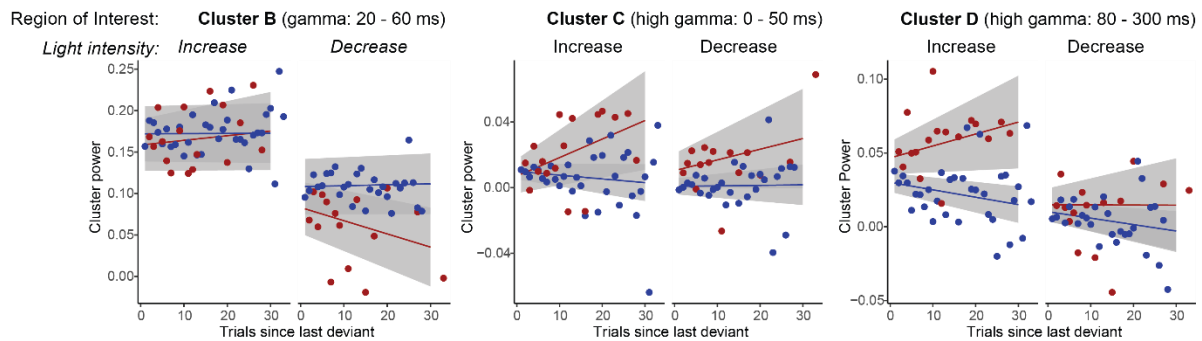

469

470 **Figure 6. Exploration of effects of stimulus history on the various VEP- and TFR-based deviance**

471 **detection features.** Analyses were performed for the earlier found VEP (A, separated for the early and late

472 negativity) and TFR (B) components. Each of the different graphs depicts the mean amplitude (for VEP

473 features) or power (for TFR features) as a function of the number of preceding standards since the

474 occurrence of the last deviant. The deviance detection amplitude is, for both VEP and TFR features, the

475 difference between the standard and deviant amplitude, which was in some cases found to increase with

476 an increasing number of preceding standards. Data are presented separately for standard and deviant

477 stimuli, as well as for intensity increases and decreases.  $n = 13$ , data is presented as mean  $\pm$  95% confidence

478 interval.

479 *Early negativity (40-60 ms):* the amplitude of the difference negativity (deviant minus

480 standard) in the early latency increased with an increase in the number of trials since the

481 last deviant, in other words an increase in the number of preceding standards (oddball  $\times$

482 trials since last deviance:  $F(1,25957)=24.6$ ,  $p<0.0001$ , Fig. 5A). Post-hoc analysis revealed  
483 that the increase in amplitudes of standard VEPs with increasing preceding standards  
484 was significant ( $t\text{-ratio}(13.9)=4.453$ ,  $p=0.0006$ ). Interestingly, the deviant amplitude was  
485 also affected, but decreased with a higher number of preceding standards ( $t\text{-}$   
486  $\text{ratio}(218.7)=2.549$ ,  $p=0.0115$ ). Furthermore, we confirmed our earlier observation that  
487 the amplitudes in the early latency window, irrespective of stimulus history, were  
488 stimulus specific (oddball  $\times$  stimulus type:  $F(1,25957)=22.1$ ,  $p<0.0001$ ).

489 *Late negativity (70-150 ms)*: amplitudes of the difference negativity in the late latency  
490 window paralleled the observations for the early component with respect to a  
491 modulation of the deviance detection by stimulus history (oddball  $\times$  trials since last  
492 deviant:  $F(1, 25958)=9.90$ ,  $p=0.002$ ). However, post-hoc analysis revealed that while the  
493 increase of the amplitude of standard VEPs with decreasing novelty was also significant  
494 ( $t\text{-ratio}(14.2)=3.295$ ,  $p=0.0052$ ), contrary to the early latency, the deviant amplitude did  
495 not show a significant decrease in amplitude ( $t\text{-ratio}(270.9)=-1.544$ ,  $p=0.1237$ ). In this  
496 latency window no overall effect of stimulus type on deviant processing was observed  
497 (oddball  $\times$  stimulus type:  $F(1,25958)=1.39$ ,  $p=0.24$ ). To further address the stimulus  
498 independency, it was tested whether the effects of stimulus history on the late component  
499 differed between the stimulus types. Addition of this interaction to the model did not  
500 improve the fit of the model ( $\Delta\text{AIC}=+2.1$ ;  $\Delta\text{BIC}=+26.4$ ; a decrease indicating improvement  
501 of the model), supporting the claim that the amplitudes in the late component were  
502 indeed stimulus non-specific.

503 *Oscillatory clusters*: for the TRF-based analysis only the high gamma clusters (C and D, 80-  
504 150 Hz) showed a trend-significant relationship between stimulus history and deviance  
505 detection (C: oddball  $\times$  trials since last deviant:  $F(1, 25980)=4.18$ ,  $p=0.04$ ; D: oddball  $\times$



506 trials since last deviant:  $F(1, 25980)=2.94, p=0.09$ , Fig. 5B). However, the large variation  
507 and p-values close to the significance threshold suggest that these analyses were  
508 underpowered and therefore should be interpreted carefully.

509

#### 510 **4. Discussion**

511 Deviance detection is an important function of the brain to identify environmental  
512 changes that may require subsequent appropriate behavioural and/or physiological  
513 responses. The goal of this study was to develop and validate a method for assessing  
514 visual deviance detection in freely behaving mice. The developed paradigm met all three  
515 pre-defined criteria: *a robust deviance response, stimulus-independence, and repeatability.*  
516 *First*, the light intensity-based oddball paradigm evoked a bi-phasic negativity in the VEP  
517 difference wave, of which the late 70-150 ms component was significantly different from  
518 zero, indicating that the paradigm was able to assess the ability of mice to differentiate  
519 between standard and deviant flashing light stimuli. *Second*, deviance detection in this  
520 late component was found to be independent of the type of stimulus (i.e., light increase  
521 or decrease) that was used a deviant. *Third*, the paradigm showed good repeatability in a  
522 second recording performed on a separate day.

523 The visual deviance detection presented with our paradigm matches well with  
524 previously reported visual deviance detection in both human and rodent EEG. The only  
525 other EEG-based visual deviance detection study in mice, in which a pattern-based  
526 oddball paradigm was used in head-fixed animals, also showed bi-phasic responses  
527 (Hamm and Yuste, 2016). They identified the differences in response to standard and  
528 deviant stimuli in early latencies to reflect stimulus-specific adaptation, while differences  
529 in later latencies reflected deviance detection activity. Also human visual ERP studies



530 indicated that early components of sensory processing represented adaptation effects,  
531 while later components were specifically associated with violations of expectation  
532 (Czigler et al., 2006; File et al., 2017). The onset and timing of the early and late phases  
533 differed for each of the studies, as well as the present study, both between and within  
534 species. Besides differences in neuronal pathways between species, deviance detection  
535 latencies may also be influenced by the stimulus complexity (Kojouharova et al., 2019).  
536 For example, Hamm and Yuste (2016), which used visual pattern stimuli instead of the  
537 light flashes used in our study, found longer latencies (between ~ 40 and 240 ms) in their  
538 mouse visual deviance detection features compared to the latencies observed in our  
539 paradigm. In our freely-moving deviance detection paradigm, we could not assess the  
540 contribution of stimulus-specific adaptation, as the ‘many standards control paradigm’  
541 (Czigler et al., 2006; Hamm and Yuste, 2016; Harms et al., 2016; File et al., 2017) was not  
542 used. We were however able to show that the early component was sensitive to stimulus  
543 properties (i.e. a larger deviance detection effect for light intensity increases), while the  
544 late component was stimulus-type-independent. Taken together, our visual deviance  
545 detection matches well with that observed in human as well as in mice. Our data show  
546 that head fixation is not required for measuring visual deviance detection in mice, and  
547 that the implemented paradigm and observed responses in mice have translational value.

548         Exploratory analysis of the effect of stimulus history showed that an increased  
549 number of trials since the last deviant, in other words a longer stretch of preceding  
550 standard presentations, increased the amplitude of the deviance detection. This was the  
551 result of an increased amplitude of standard VEP responses and a decreased amplitude  
552 of deviant VEP responses with a higher number of preceding standards. These changes  
553 seem to suggest that our VEP-based deviance detection paradigm was sensitive to how  
554 deviant a deviant stimulus is; as it showed larger responses when the previous deviant

555 was presented a longer time ago. The observed positive relationship between deviance  
556 detection amplitude and number of preceding standards could be a result of stimulus-  
557 specific adaptation of the standard, in our paradigm leading to increased amplitudes after  
558 more repetitions. However, larger deviance detection after more preceding standards  
559 could also result from the brain's response to the violation of a stronger memory-based  
560 expectation of the standard (Garrido et al., 2009). Although counterintuitive, violation-  
561 alerting activity in our data would actually be represented by the observed reduction in  
562 deviant amplitude, resulting in an increased difference with a standard. Further studies  
563 are needed to determine which of these two processes primarily drives the deviance  
564 detection features in our paradigm.

565         Larger differences in responses to standard and deviant visual pattern stimuli  
566 with more preceding standards have previously also been shown in rats, although this  
567 difference was dominantly driven by alterations in the responses to the deviant without  
568 a change in responses to the standard (Vinken et al., 2017). Also in human auditory MMN  
569 paradigms the amplitude of the MMN increases when the overall probability of deviants  
570 is decreased from 30% to 10% or from 13% to 1.5% (Sato et al., 2000; Sabri and  
571 Campbell, 2001), as well as with a higher number of standards preceding a deviant within  
572 a paradigm with a stable overall deviant probability of 20% (Matuoka et al., 2006).  
573 Together, these findings suggest that the effect size of our deviant detection paradigm  
574 could be further increased by having a higher minimum number of standards between  
575 deviants than the two currently used in our experiments.

576         In addition to the VEP waveforms, deviance detection was also found to be  
577 represented in both evoked and induced oscillatory activity. Human visual and mouse  
578 auditory studies have previously shown oscillatory responses related to deviance

579 detection, but the paradigms and corresponding responses showed large variability  
580 (Stothart and Kazanina, 2013; Ahnaou et al., 2017; Hesse et al., 2017; Yan et al., 2017).  
581 Differences across paradigms and species, as well as the fact that some of these studies  
582 use auditory while others use visual stimuli, make a direct comparison of findings from  
583 the studies assessing frequency response in deviance detection paradigms difficult.

584 In the TFR the higher gamma clusters between 50-150 Hz represented induced  
585 (i.e. non-phase-locked) oscillatory activity. This is in line with the fact that induced power,  
586 thought to represent top-down connections, concerns higher frequencies over longer  
587 latencies, while evoked power, thought to represent bottom-up connections, concerns  
588 lower frequencies over shorter latencies (Chen et al., 2012). The broad increase in high  
589 gamma power (80-150 Hz) showed a tendency to be enhanced with more preceding  
590 standards, although this effect was not statistically significant. Gamma frequency cortical  
591 activity has generally been linked to increased spiking activity and network excitation  
592 (Yizhar et al., 2011; Cho et al., 2015; Vogt et al., 2015). In the visual cortex of freely  
593 behaving mice, 30-100 Hz broadband gamma activity was found to functionally  
594 discriminate between segregated cortical layers of visual processing (Senzai et al., 2019).  
595 It was showed that gamma activity can be subdivided into functionally distinct broad-  
596 (30-90 Hz) and narrowband (60 Hz) gamma oscillations, which show complementary  
597 responses to changes in visual contrast (Saleem et al., 2017). While narrowband gamma  
598 has been associated with thalamocortical communication, broadband gamma power is  
599 thought to represent corticocortical communication. Although our recordings did not  
600 allow to distinguish between underlying network mechanisms, the broad increase in high  
601 gamma band activity we observed in the TFR deviant minus standard difference plots  
602 could reflect increased corticocortical network activity during deviance processing. This  
603 could suggest involvement of the prefrontal cortex, in line with what was found in human

604 visual deviance detection studies (Yucel et al., 2007; Kimura et al., 2010; Kimura et al.,  
605 2011), although no robust visual evoked responses were recorded from our prefrontal  
606 cortex electrode. The presence of induced broadband gamma responses thus seems to  
607 suggest communication between the visual cortex and other cortical areas during visual  
608 deviance detection. Whether this concerns frontal cortical areas remains to be studied.

609 In conclusion, we developed the first, robust and repeatable visual deviance  
610 detection paradigm based on changes in light intensity in freely behaving mice. Our  
611 paradigm provides a functional outcome measure for visual processing in these mice.  
612 Because no head fixation is needed, our paradigm minimizes animal discomfort while  
613 increasing behavioural relevance. The paradigm can easily be implemented to assess  
614 sensory processing deficits in mouse models of brain disease, and has the possibility to  
615 be compared with experiments in humans which increases translatability of preclinical  
616 outcomes.

617

618

## 619 **Acknowledgements**

620 This work was supported by a ZonMW TOP [grant number 91216021, 2017, awarded to  
621 HB and MJK] and the national Medical NeuroDelta [awarded to AvdM].

622

## 623 **Declaration of interest**

624 None

625

626 **Author contribution statement**

627 **Renate Kat:** Conceptualization, methodology, investigation, formal analysis,  
628 visualization, writing – original draft **Berry van der Berg:** Formal analysis, visualization,  
629 writing – reviewing & editing **Matthijs JL Perenboom:** Methodology, software **Maarten**  
630 **Schenke:** Investigation **Arn MJM van den Maagdenberg:** Resources, funding  
631 acquisition, writing – review & editing **Hilgo Bruining:** Funding acquisition, writing –  
632 review & editing **Else A Tolner:** Conceptualization, writing – reviewing & editing,  
633 supervision **Martien JH Kas:** Conceptualization, funding acquisition, writing – reviewing  
634 & editing, supervision

635

636 **References**

637 Ahnaou, A., Moechars, D., Raeymaekers, L., Biermans, R., Manyakov, N. V., Bottelbergs, A.,  
638 Wintmolders, C., Van Kolen, K., Van De Castele, T., Kemp, J.A., Drinkenburg, W.H.,  
639 2017. Emergence of early alterations in network oscillations and functional  
640 connectivity in a tau seeding mouse model of Alzheimer’s disease pathology. *Sci.*  
641 *Rep.* 7, 1–14. <https://doi.org/10.1038/s41598-017-13839-6>

642 Baker, M., 2013. Neuroscience: Through the eyes of a mouse. *Nature* 502, 156–158.  
643 <https://doi.org/10.1038/502156a>

644 Bates, D., Maechler, M., Bolker, B., Walker, S., 2015. Package lme4. *J. Stat. Softw.* 67, 1–91.  
645 <https://doi.org/http://lme4.r-forge.r-project.org>

646 Carrillo-Reid, L., Han, S., Yang, W., Akrouh, A., Yuste, R., 2019. Controlling Visually  
647 Guided Behavior by Holographic Recalling of Cortical Ensembles. *Cell* 178, 447-  
648 457.e5. <https://doi.org/10.1016/j.cell.2019.05.045>

- 649 Chen, C.C., Kiebel, S.J., Kilner, J.M., Ward, N.S., Stephan, K.E., Wang, W.J., Friston, K.J.,  
650 2012. A dynamic causal model for evoked and induced responses. *Neuroimage* 59,  
651 340–348. <https://doi.org/10.1016/j.neuroimage.2011.07.066>
- 652 Cho, K.K.A., Hoch, R., Lee, A.T., Patel, T., Rubenstein, J.L.R., Sohal, V.S., 2015. Gamma  
653 rhythms link prefrontal interneuron dysfunction with cognitive inflexibility in  
654 *dlx5/6+/-* mice. *Neuron* 85, 1332–1343.  
655 <https://doi.org/10.1016/j.neuron.2015.02.019>
- 656 Czigler, I., Weisz, J., Winkler, I., 2006. ERPs and deviance detection: Visual mismatch  
657 negativity to repeated visual stimuli. *Neurosci. Lett.* 401, 178–182.  
658 <https://doi.org/10.1016/j.neulet.2006.03.018>
- 659 File, D., File, B., Bodnár, F., Sulykos, I., Kecskés-Kovács, K., Czigler, I., 2017. Visual  
660 mismatch negativity (vMMN) for low- and high-level deviances: A control study.  
661 *Attention, Perception, Psychophys.* 79, 2153–2170.  
662 <https://doi.org/10.3758/s13414-017-1373-y>
- 663 Fournier, J., Saleem, A.B., Diamanti, E.M., Wells, M.J., Harris, K.D., Carandini, M., 2020.  
664 Mouse Visual Cortex Is Modulated by Distance Traveled and by Theta Oscillations.  
665 *Curr. Biol.* 30, 3811–3817.e6. <https://doi.org/10.1016/j.cub.2020.07.006>
- 666 Garrido, M.I., Kilner, J.M., Stephan, K.E., Friston, K.J., 2009. The mismatch negativity: A  
667 review of underlying mechanisms. *Clin. Neurophysiol.* 120, 453–463.  
668 <https://doi.org/10.1016/j.clinph.2008.11.029>
- 669 Grimm, S., Escera, C., Nelken, I., 2016. Early indices of deviance detection in humans and  
670 animal models. *Biol. Psychol.* 116, 23–27.  
671 <https://doi.org/10.1016/j.biopsycho.2015.11.017>

- 672 Hamm, J.P., Shymkiv, Y., Mukai, J., Gogos, J.A., Yuste, R., 2020. Aberrant Cortical  
673 Ensembles and Schizophrenia-like Sensory Phenotypes in *Setd1a*<sup>+/-</sup> Mice. *Biol.*  
674 *Psychiatry* 88, 215–223. <https://doi.org/10.1016/j.biopsych.2020.01.004>
- 675 Hamm, J.P., Yuste, R., 2016. Somatostatin Interneurons Control a Key Component of  
676 Mismatch Negativity in Mouse Visual Cortex. *Cell Rep.* 16, 597–604.  
677 <https://doi.org/10.1016/j.celrep.2016.06.037>
- 678 Harms, L., Michie, P.T., Näätänen, R., 2016. Criteria for determining whether mismatch  
679 responses exist in animal models: Focus on rodents. *Biol. Psychol.* 116, 28–35.  
680 <https://doi.org/10.1016/j.biopsycho.2015.07.006>
- 681 Hesse, P.N., Schmitt, C., Klingenhoefer, S., Bremmer, F., 2017. Preattentive processing of  
682 numerical visual information. *Front. Hum. Neurosci.* 11, 1–14.  
683 <https://doi.org/10.3389/fnhum.2017.00070>
- 684 Hubel, D., Wiesel, T., 1968. Receptive Fields and Functional Architecture of Monkey  
685 Striate Cortex. *J. Physiol.* 195, 215–243.  
686 <https://doi.org/10.1113/jphysiol.1968.sp008455>
- 687 Hubel, D.H., 1959. Single unit activity in striate cortex of unrestrained cats. *J. Physiol.*  
688 147, 226–238. <https://doi.org/10.1113/jphysiol.1959.sp006238>
- 689 Jones, S.R., 2016. When brain rhythms aren't 'rhythmic': implication for their  
690 mechanisms and meaning. *Curr. Opin. Neurobiol.* 40, 72–80.  
691 <https://doi.org/10.1016/j.conb.2016.06.010>
- 692 Kimura, M., 2012. Visual mismatch negativity and unintentional temporal-context-based  
693 prediction in vision. *Int. J. Psychophysiol.* 83, 144–155.  
694 <https://doi.org/10.1016/j.ijpsycho.2011.11.010>

- 695 Kimura, M., Kondo, H., Ohira, H., Schröger, E., 2011. Unintentional temporal context-  
696 based prediction of emotional faces: An electrophysiological study. *Cereb. Cortex*  
697 22, 1774–1785. <https://doi.org/10.1093/cercor/bhr244>
- 698 Kimura, M., Ohira, H., Schröger, E., 2010a. Localizing sensory and cognitive systems for  
699 pre-attentive visual deviance detection: An sLORETA analysis of the data of Kimura  
700 et al. (2009). *Neurosci. Lett.* 485, 198–203.  
701 <https://doi.org/10.1016/j.neulet.2010.09.011>
- 702 Kimura, M., Widmann, A., Schröger, E., 2010b. Human visual system automatically  
703 represents large-scale sequential regularities. *Brain Res.* 1317, 165–179.  
704 <https://doi.org/10.1016/j.brainres.2009.12.076>
- 705 Kojouharova, P., File, D., Sulykos, I., Czigler, I., 2019. Visual mismatch negativity and  
706 stimulus-specific adaptation: the role of stimulus complexity. *Exp. Brain Res.* 237,  
707 1179–1194. <https://doi.org/10.1007/s00221-019-05494-2>
- 708 Kriegeskorte, N., Simmons, W.K., Bellgowan, P.S., Baker, C.I., 2009. Circular analysis in  
709 systems neuroscience: The dangers of double dipping. *Nat. Neurosci.* 12, 535–540.  
710 <https://doi.org/10.1038/nn.2303>
- 711 Kuznetsova, A., Brockhoff, P.B., Christensen, R.H.B., 2017. lmerTest Package: Tests in  
712 Linear Mixed Effects Models. *J. Stat. Softw.* 82, 1–26.  
713 <https://doi.org/10.18637/jss.v082.i13>
- 714 Maris, E., Oostenveld, R., 2007. Nonparametric statistical testing of EEG- and MEG-data.  
715 *J. Neurosci. Methods* 164, 177–190.  
716 <https://doi.org/10.1016/j.jneumeth.2007.03.024>
- 717 Matuoka, T., Yabe, H., Shinozaki, N., Sato, Y., Hiruma, T., Ren, A., Hara, E., Kaneko, S.,



- 718 2006. The Development of Memory Trace Depending on the Number of the  
719 Standard Stimuli. *Clin. EEG Neurosci.* 37, 223–229.  
720 <https://doi.org/10.1177/155005940603700312>
- 721 Matuschek, H., Kliegl, R., Vasishth, S., Baayen, H., Bates, D., 2017. Balancing Type I error  
722 and power in linear mixed models. *J. Mem. Lang.* 94, 305–315.  
723 <https://doi.org/10.1016/j.jml.2017.01.001>
- 724 May, P., Tiitinen, H., Ilmoniemi, R.J., Nyman, G., Taylor, J.G., Näätänen, R., 1999.  
725 Frequency change detection in human auditory cortex. *J. Comput. Neurosci.* 6, 99–  
726 120. <https://doi.org/10.1023/A:1008896417606>
- 727 Montijn, J.S., Olcese, U., Pennartz, C.M.A., 2016. Visual stimulus detection correlates with  
728 the consistency of temporal sequences within stereotyped events of V1 neuronal  
729 population activity. *J. Neurosci.* 36, 8624–8640.  
730 <https://doi.org/10.1523/JNEUROSCI.0853-16.2016>
- 731 Näätänen, R., Sussman, E.S., Salisbury, D., Shafer, V.L., 2014. Mismatch negativity (MMN)  
732 as an index of cognitive dysfunction. *Brain Topogr.* 27, 451–466.  
733 <https://doi.org/10.1007/s10548-014-0374-6>
- 734 Oostenveld, R., Fries, P., Maris, E., Schoffelen, J.M., 2011. FieldTrip: Open source software  
735 for advanced analysis of MEG, EEG, and invasive electrophysiological data. *Comput.*  
736 *Intell. Neurosci.* 2011. <https://doi.org/10.1155/2011/156869>
- 737 Park, J., van den Berg, B., Chiang, C., Woldorff, M.G., Brannon, E.M., 2018. Developmental  
738 trajectory of neural specialization for letter and number visual processing. *Dev. Sci.*  
739 21, 1–14. <https://doi.org/10.1111/desc.12578>
- 740 Perenboom, T., Schenke, M., Ferrari, M., Terwindt, G., van den Maagdenberg, A., Tolner,

- 741 E., 2020. Responsivity to light in familial hemiplegic migraine type 1 mutant mice  
742 reveals frequency-dependent enhancement of visual network excitability. *Eur. J.*  
743 *Neurosci.* 53, 1672–1686. <https://doi.org/10.1111/ejn.15041>
- 744 Sabri, M., Campbell, K.B., 2001. Effects of sequential and temporal probability of deviant  
745 occurrence on mismatch negativity. *Cogn. Brain Res.* 12, 171–180.  
746 [https://doi.org/10.1016/S0926-6410\(01\)00026-X](https://doi.org/10.1016/S0926-6410(01)00026-X)
- 747 Saleem, A.B., Lien, A.D., Krumin, M., Haider, B., Rosón, M.R., Ayaz, A., Reinhold, K., Busse,  
748 L., Carandini, M., Harris, K.D., Carandini, M., 2017. Subcortical Source and  
749 Modulation of the Narrowband Gamma Oscillation in Mouse Visual Cortex. *Neuron*  
750 93, 315–322. <https://doi.org/10.1016/j.neuron.2016.12.028>
- 751 Sassenhagen, J., Draschkow, D., 2019. Cluster-based permutation tests of MEG/EEG data  
752 do not establish significance of effect latency or location. *Psychophysiology* 56, 1–8.  
753 <https://doi.org/10.1111/psyp.13335>
- 754 Sato, Y., Yabe, H., Hiruma, T., Sutoh, T., Shinozaki, N., Nashida, T., Kaneko, S., 2000. The  
755 effect of deviant stimulus probability on the human mismatch process. *Neuroreport*  
756 11, 3703–3708. <https://doi.org/10.1097/00001756-200011270-00023>
- 757 Sculthorpe, L.D., Ouellet, D.R., Campbell, K.B., 2009. MMN elicitation during natural sleep  
758 to violations of an auditory pattern. *Brain Res.* 1290, 52–62.  
759 <https://doi.org/10.1016/j.brainres.2009.06.013>
- 760 Senzai, Y., Fernandez-Ruiz, A., Buzsáki, G., 2019. Layer-Specific Physiological Features  
761 and Interlaminar Interactions in the Primary Visual Cortex of the Mouse. *Neuron*  
762 101, 500–513.e5. <https://doi.org/10.1016/j.neuron.2018.12.009>
- 763 Sohya, K., Kameyama, K., Yanagawa, Y., Obata, K., Tsumoto, T., 2007. GABAergic neurons

764 are less selective to stimulus orientation than excitatory neurons in layer II/III of  
765 visual cortex, as revealed by in vivo functional Ca<sup>2+</sup> imaging in transgenic mice. *J.*  
766 *Neurosci.* 27, 2145–2149. <https://doi.org/10.1523/JNEUROSCI.4641-06.2007>

767 Stagg, C., Hindley, P., Tales, A., Butler, S., 2004. Visual mismatch negativity: the detection  
768 of stimulus change. *Neuroreport* 15, 487–491.  
769 <https://doi.org/10.1097/01.wnr.00001>

770 Stothart, G., Kazanina, N., 2013. Oscillatory characteristics of the visual mismatch  
771 negativity; what evoked potentials aren't telling us. *Front. Hum. Neurosci.* 7, 1–9.  
772 <https://doi.org/10.3389/fnhum.2013.00426>

773 Sulykos, I., Czigler, I., 2014. Visual mismatch negativity is sensitive to illusory brightness  
774 changes. *Brain Res.* 1561, 48–59. <https://doi.org/10.1016/j.brainres.2014.03.008>

775 Tada, M., Kirihara, K., Mizutani, S., Uka, T., Kunii, N., Koshiyama, D., Fujioka, M., Usui, K.,  
776 Nagai, T., Araki, T., Kasai, K., 2019. Mismatch negativity (MMN) as a tool for  
777 translational investigations into early psychosis: A review. *Int. J. Psychophysiol.*  
778 145, 5–14. <https://doi.org/10.1016/j.ijpsycho.2019.02.009>

779 Van Diepen, H.C., Ramkisoensing, A., Peirson, S.N., Foster, R.G., Meijer, J.H., 2013.  
780 Irradiance encoding in the suprachiasmatic nuclei by rod and cone photoreceptors.  
781 *FASEB J.* 27, 4204–4212. <https://doi.org/10.1096/fj.13-233098>

782 Vinken, K., Vogels, R., Op de Beeck, H., 2017. Recent Visual Experience Shapes Visual  
783 Processing in Rats through Stimulus-Specific Adaptation and Response  
784 Enhancement. *Curr. Biol.* 27, 914–919. <https://doi.org/10.1016/j.cub.2017.02.024>

785 Vogt, D., Cho, K.K.A., Lee, A.T., Sohal, V.S., Rubenstein, J.L.R., 2015. The  
786 Parvalbumin/Somatostatin Ratio Is Increased in Pten Mutant Mice and by Human

- 787 PTEN ASD Alleles. *Cell Rep.* 11, 944–956.
- 788 <https://doi.org/10.1016/j.celrep.2015.04.019>
- 789 Warden, M.R., Cardin, J.A., Deisseroth, K., 2014. Optical neural interfaces. *Annu. Rev.*
- 790 *Biomed. Eng.* 16, 103–129. [https://doi.org/10.1146/annurev-bioeng-071813-](https://doi.org/10.1146/annurev-bioeng-071813-104733)
- 791 [104733](https://doi.org/10.1146/annurev-bioeng-071813-104733)
- 792 Yan, T., Feng, Y., Liu, T., Wang, L., Mu, N., Dong, X., Liu, Z., Qin, T., Tang, X., Zhao, L., 2017.
- 793 Theta oscillations related to orientation recognition in unattended condition: A
- 794 vMMN study. *Front. Behav. Neurosci.* 11, 1–8.
- 795 <https://doi.org/10.3389/fnbeh.2017.00166>
- 796 Yizhar, O., Fenno, L.E., Prigge, M., Schneider, F., Davidson, T.J., Shea, D.J.O., Sohal, V.S.,
- 797 Goshen, I., Finkelstein, J., Paz, J.T., Stehfest, K., Fudim, R., Ramakrishnan, C.,
- 798 Huguenard, J.R., Hegemann, P., Deisseroth, K., 2011. Neocortical excitation /
- 799 inhibition balance in information processing and social dysfunction. *Nature* 477,
- 800 171–178. <https://doi.org/10.1038/nature10360>
- 801 Yucel, G., McCarthy, G., Belger, A., 2007. fMRI reveals that involuntary visual deviance
- 802 processing is resource limited. *Neuroimage* 34, 1245–1252.
- 803 <https://doi.org/10.1016/j.neuroimage.2006.08.050>
- 804 Zhang, D., Yu, B., Liu, J., Jiang, W., Xie, T., Zhang, R., Tong, D., Qiu, Z., Yao, H., 2017. Altered
- 805 visual cortical processing in a mouse model of MECP2 duplication syndrome. *Sci.*
- 806 *Rep.* 7, 1–14. <https://doi.org/10.1038/s41598-017-06916-3>
- 807
- 808

809 **Supplementary Material**

810

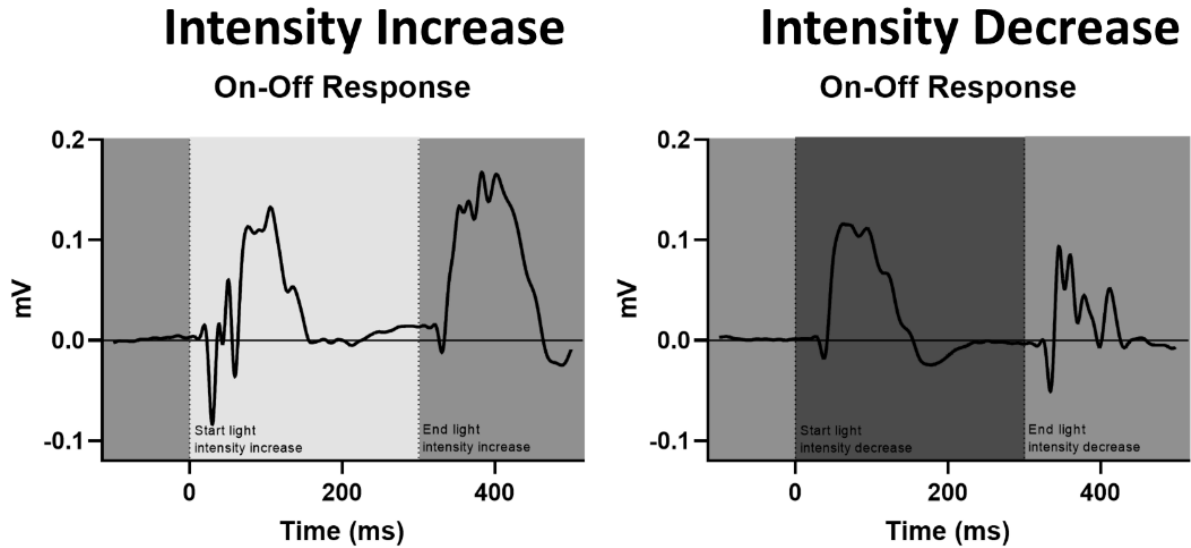

811

812 *Figure S1. Comparison of VEP waveforms for the On- and Off-responses to a light*  
813 **intensity increase versus light intensity decreases.** Light Stimuli lasted for 300 ms,  
814 whereby these plots show the 'On-response' to the start of the 300-ms intensity increase  
815 or decrease as well as the VEP 'Off-response' to the light intensity changing back to  
816 baseline level. The On-response of the light increase, as well as the Off-response of the  
817 light decrease, concern a response to an increase in light intensity. The On-response of  
818 the light decrease, as well as the Off-response of the light increase, concern a response to  
819 a light intensity decrease. Presented data show the responses to light increases and  
820 decreases, averaged for right and left V1 responses and the 2 recordings on separate days.
